# Supplementary material for: Psychoactive pharmaceuticals as environmental contaminants may disrupt highly inter-connected nodes in an Autism-associated protein-protein interaction network
Source: PubMed Central journal article supplement (PMC4423768; doi:10.1186/1471-2105-16-s7-s3), 2015-04-23
Supplement: 1471-2105-16-S7-S3-S5.pdf [file 1471-2105-16-S7-S3-S5.pdf]

# Analysis of ASD protein-protein networks

October 14, 2014

Table 1: Network summary statistics for the ASD complete network

|           | Degree | Close.   | Between.   | Clust coef. | Top. coef | Avg. Short. path | Radiality | Eccentricity | Stress    | Connectivity |
|-----------|--------|----------|------------|-------------|-----------|------------------|-----------|--------------|-----------|--------------|
| $n$       | 7212.0 | 1948.000 | 1948.00000 | 1948.000    | 1948.000  | 1948.000         | 1948.0    | 1948         | 1948.0    | 1948.000     |
| min       | 1.0    | 0.166    | 0.00000    | 0.000       | 0.000     | 1.000            | 0.4       | 1            | 0.0       | 1.000        |
| max       | 248.0  | 1.000    | 0.06729    | 1.000       | 1.000     | 6.035            | 1.0       | 9            | 2941778.0 | 212.000      |
| $\bar{x}$ | 9.3    | 0.303    | 0.00125    | 0.195       | 0.208     | 3.416            | 0.7       | 6            | 54694.1   | 37.122       |
| median    | 5.0    | 0.299    | 0.00022    | 0.111       | 0.162     | 3.341            | 0.7       | 6            | 9953.0    | 29.250       |
| HL-loc.   | 6.0    | 0.298    | 0.00044    | 0.146       | 0.185     | 3.379            | 0.7       | 6            | 18405.0   | 32.038       |
| $s$       | 15.9   | 0.078    | 0.00407    | 0.246       | 0.170     | 0.545            | 0.1       | 1            | 176884.5  | 31.201       |
| IQR       | 8.0    | 0.048    | 0.00093    | 0.267       | 0.197     | 0.548            | 0.1       | 1            | 36448.5   | 29.082       |
| kurtosis  | 51.1   | 57.489   | 124.75551  | 3.553       | 1.514     | 4.379            | 4.4       | 18           | 116.0     | 8.870        |
| skew      | 5.9    | 6.610    | 9.64041    | 1.953       | 1.228     | 0.189            | -0.2      | -2           | 9.3       | 2.481        |

3

Table 2: ASD network summary statistics for significantly enriched fish genes in the presence of CBZ

|           | Degree | Close. | Between. | Clust coef. | Top. coef | Avg. Short. path | Radiality | Eccentricity | Stress    | Connectivity |
|-----------|--------|--------|----------|-------------|-----------|------------------|-----------|--------------|-----------|--------------|
| $n$       | 116.0  | 48.000 | 48.00000 | 48.000      | 48.000    | 48.000           | 48.0      | 48           | 48.0      | 48.000       |
| min       | 1.0    | 0.254  | 0.00000  | 0.000       | 0.000     | 2.352            | 0.7       | 5            | 0.0       | 8.200        |
| max       | 244.0  | 0.425  | 0.06703  | 1.000       | 0.552     | 3.940            | 0.8       | 7            | 2618448.0 | 65.000       |
| $\bar{x}$ | 20.4   | 0.322  | 0.00427  | 0.178       | 0.150     | 3.155            | 0.8       | 6            | 182075.3  | 32.112       |
| median    | 11.0   | 0.325  | 0.00091  | 0.120       | 0.114     | 3.075            | 0.8       | 6            | 39500.0   | 32.604       |
| HL-loc.   | 13.5   | 0.320  | 0.00175  | 0.136       | 0.120     | 3.146            | 0.8       | 6            | 80777.5   | 31.999       |
| $s$       | 32.2   | 0.039  | 0.01114  | 0.208       | 0.129     | 0.378            | 0.0       | 1            | 446366.1  | 13.293       |
| IQR       | 17.2   | 0.054  | 0.00313  | 0.134       | 0.092     | 0.542            | 0.1       | 0            | 151132.5  | 18.019       |
| kurtosis  | 23.8   | 0.101  | 23.18651 | 8.967       | 1.831     | -0.548           | -0.5      | -0           | 21.0      | -0.327       |
| skew      | 4.3    | 0.453  | 4.61645  | 2.813       | 1.556     | 0.120            | -0.1      | -0           | 4.4       | 0.325        |

Table 3: ASD network summary statistics for significantly enriched fish genes in the presence of VNX

|           | Degree | Close.  | Between.  | Clust coef. | Top. coef | Avg. Short. path | Radiality | Eccentricity | Stress    | Connectivity |
|-----------|--------|---------|-----------|-------------|-----------|------------------|-----------|--------------|-----------|--------------|
| <i>n</i>  | 232.0  | 103.000 | 103.00000 | 103.000     | 103.000   | 103.000          | 103.0     | 103          | 103.0     | 103.000      |
| min       | 1.0    | 0.196   | 0.00000   | 0.000       | 0.000     | 2.475            | 0.5       | 5            | 0.0       | 3.000        |
| max       | 160.0  | 0.404   | 0.02903   | 1.000       | 0.769     | 5.090            | 0.8       | 8            | 1629878.0 | 207.000      |
| $\bar{x}$ | 15.5   | 0.308   | 0.00184   | 0.158       | 0.179     | 3.303            | 0.7       | 6            | 83830.4   | 36.293       |
| median    | 8.5    | 0.310   | 0.00061   | 0.108       | 0.145     | 3.221            | 0.8       | 6            | 28128.0   | 32.111       |
| HL-loc.   | 11.0   | 0.309   | 0.00104   | 0.119       | 0.157     | 3.253            | 0.7       | 6            | 43609.0   | 32.565       |
| <i>s</i>  | 20.8   | 0.038   | 0.00358   | 0.198       | 0.144     | 0.458            | 0.1       | 1            | 185122.9  | 27.124       |
| IQR       | 16.0   | 0.046   | 0.00190   | 0.172       | 0.156     | 0.482            | 0.1       | 0            | 80376.0   | 24.440       |
| kurtosis  | 15.1   | 0.467   | 33.37209  | 8.042       | 2.970     | 2.830            | 2.8       | 2            | 48.3      | 15.229       |
| skew      | 3.3    | -0.362  | 5.00705   | 2.570       | 1.581     | 1.352            | -1.4      | 1            | 6.2       | 3.029        |

4

Table 4: ASD network summary statistics for significantly enriched fish genes in the presence of FLX

|           | Degree | Close. | Between. | Clust coef. | Top. coef | Avg. Short. path | Radiality | Eccentricity | Stress   | Connectivity |
|-----------|--------|--------|----------|-------------|-----------|------------------|-----------|--------------|----------|--------------|
| <i>n</i>  | 41.0   | 16.000 | 16.00000 | 16.000      | 16.000    | 16.000           | 16.0      | 16           | 16.0     | 16.000       |
| min       | 1.0    | 0.175  | 0.00000  | 0.000       | 0.000     | 1.000            | 0.5       | 1            | 0.0      | 1.000        |
| max       | 33.0   | 1.000  | 0.00559  | 1.000       | 0.582     | 5.724            | 1.0       | 9            | 237990.0 | 108.000      |
| $\bar{x}$ | 5.4    | 0.322  | 0.00068  | 0.221       | 0.214     | 3.549            | 0.7       | 6            | 31560.5  | 31.156       |
| median    | 3.0    | 0.283  | 0.00003  | 0.107       | 0.186     | 3.535            | 0.7       | 6            | 1680.0   | 25.809       |
| HL-loc.   | 3.5    | 0.284  | 0.00015  | 0.167       | 0.202     | 3.548            | 0.7       | 6            | 5176.0   | 26.004       |
| <i>s</i>  | 7.5    | 0.186  | 0.00147  | 0.300       | 0.196     | 0.977            | 0.1       | 2            | 65393.6  | 28.864       |
| IQR       | 4.0    | 0.054  | 0.00044  | 0.333       | 0.307     | 0.664            | 0.1       | 1            | 16947.0  | 24.383       |
| kurtosis  | 8.5    | 13.852 | 8.76564  | 1.776       | -1.076    | 3.559            | 3.6       | 7            | 6.6      | 2.656        |
| skew      | 2.9    | 3.605  | 2.85047  | 1.523       | 0.452     | -0.439           | 0.4       | -2           | 2.5      | 1.575        |

Table 5: Network summary statistics for genes in human cell plates significantly enriched genes in the presence of a PCPP mixture

|           | Degree | Close. | Between. | Clust coef. | Top. coef | Avg. Short. path | Radiality | Eccentricity | Stress    | Connectivity |
|-----------|--------|--------|----------|-------------|-----------|------------------|-----------|--------------|-----------|--------------|
| $n$       | 158.0  | 70.000 | 70.00000 | 70.000      | 70.000    | 70.000           | 70.0      | 70           | 70.0      | 70.000       |
| min       | 1.0    | 0.184  | 0.00000  | 0.000       | 0.000     | 2.403            | 0.5       | 5            | 0.0       | 5.000        |
| max       | 244.0  | 0.416  | 0.03814  | 0.833       | 0.500     | 5.446            | 0.8       | 8            | 1793540.0 | 212.000      |
| $\bar{x}$ | 15.5   | 0.305  | 0.00217  | 0.135       | 0.148     | 3.341            | 0.7       | 6            | 100337.4  | 40.938       |
| median    | 7.0    | 0.308  | 0.00048  | 0.105       | 0.115     | 3.252            | 0.7       | 6            | 21803.0   | 31.552       |
| HL-loc.   | 9.0    | 0.306  | 0.00087  | 0.111       | 0.134     | 3.291            | 0.7       | 6            | 40525.0   | 33.583       |
| $s$       | 29.4   | 0.042  | 0.00639  | 0.155       | 0.117     | 0.511            | 0.1       | 1            | 291702.9  | 40.005       |
| IQR       | 13.0   | 0.054  | 0.00182  | 0.176       | 0.136     | 0.573            | 0.1       | 0            | 82254.5   | 28.190       |
| kurtosis  | 32.6   | 0.775  | 27.58532 | 6.624       | 0.542     | 3.687            | 3.7       | 2            | 26.7      | 9.864        |
| skew      | 5.2    | -0.094 | 5.19960  | 2.202       | 1.005     | 1.376            | -1.4      | 1            | 5.1       | 2.961        |

5

Table 6: Network summary statistics for genes in human cell plates significantly enriched genes in the presence of VPA

|           | Degree | Close.  | Between.  | Clust coef. | Top. coef | Avg. Short. path | Radiality | Eccentricity | Stress    | Connectivity |
|-----------|--------|---------|-----------|-------------|-----------|------------------|-----------|--------------|-----------|--------------|
| $n$       | 727.0  | 257.000 | 257.00000 | 257.000     | 257.000   | 257.000          | 257.0     | 257          | 257.0     | 257.000      |
| min       | 1.0    | 0.184   | 0.00000   | 0.000       | 0.000     | 1.000            | 0.5       | 1            | 0.0       | 1.000        |
| max       | 196.0  | 1.000   | 0.03814   | 1.000       | 0.654     | 5.446            | 1.0       | 8            | 1793540.0 | 212.000      |
| $\bar{x}$ | 11.5   | 0.303   | 0.00152   | 0.176       | 0.185     | 3.374            | 0.7       | 6            | 65696.8   | 35.753       |
| median    | 6.0    | 0.300   | 0.00030   | 0.111       | 0.153     | 3.334            | 0.7       | 6            | 14202.0   | 28.000       |
| HL-loc.   | 7.5    | 0.301   | 0.00060   | 0.140       | 0.169     | 3.348            | 0.7       | 6            | 25426.0   | 31.000       |
| $s$       | 19.4   | 0.058   | 0.00414   | 0.207       | 0.138     | 0.473            | 0.1       | 1            | 180533.8  | 29.630       |
| IQR       | 9.0    | 0.046   | 0.00116   | 0.198       | 0.163     | 0.516            | 0.1       | 1            | 49698.0   | 26.307       |
| kurtosis  | 35.3   | 83.750  | 40.35851  | 5.319       | 1.152     | 3.797            | 3.8       | 18           | 46.0      | 13.514       |
| skew      | 5.2    | 6.934   | 5.87239   | 2.132       | 1.170     | 0.426            | -0.4      | -2           | 6.2       | 2.963        |
